# Supplementary material for: Ki-67 Expression is a Significant Prognostic Factor Only When Progesterone Receptor Expression is Low in Estrogen Receptor-Positive and HER2-Negative Early Breast Cancer
Source: Hindawi journal article supplement (doi:10.1155/2019/7386734), 2019-12-28
Supplement: f1 [file 7386734.f1.pdf]

## Appendix 1

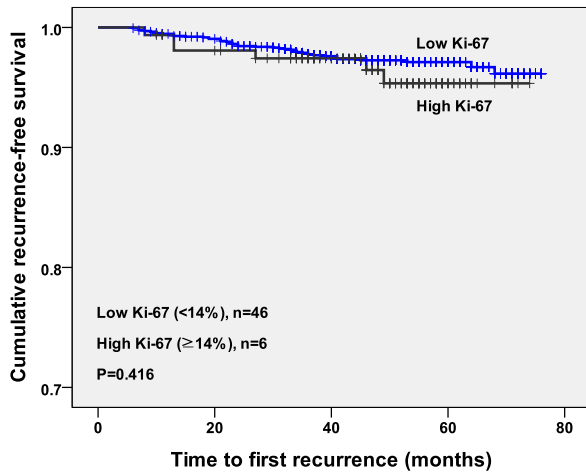

Recurrence free survival (RFS) according to Ki-67 index by 14% cut-off value

## Appendix 2

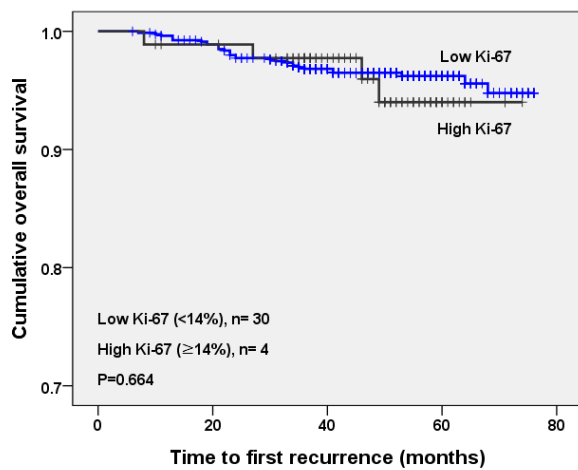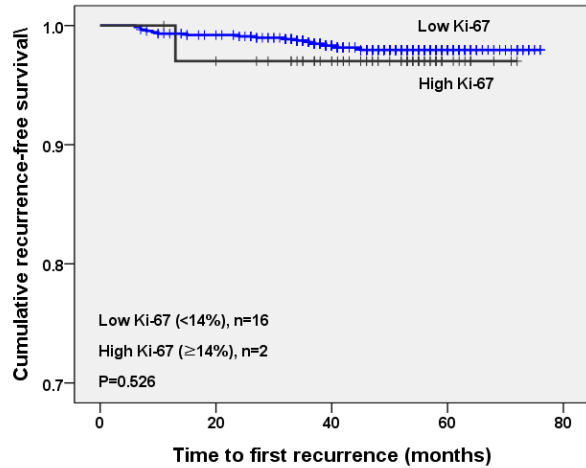

a. RFS in the low PgR subset

b. RFS in the high PgR subset

RFS of patients in high and low Ki-67 by 14% cut-off value according to progesterone receptor expression status (a) RFS according to Ki-67 in the low PgR subset (b) RFS according to Ki-67 in the high PgR subset
